# Supplementary material for: Graphene oxide/graphitic carbon nitride/polyamide oxime nanofibers for adsorption and photocatalytic reduction of uranium from seawater
Source: Royal Society of Chemistry journal article supplement (doi:10.1039/d4qi01553c), 2024-01-01
Supplement: d4qi01553c1.pdf [file d4qi01553c1.pdf]

1

*Electronic supplementary information*

2 **Graphene oxide/ graphitic carbon nitride/ polyamide oxime nanofibers**  
3 **with adsorption and photocatalytic reduction of uranium from seawater**

4 *Shiliang Qin<sup>a</sup>, Jianang Sha<sup>b,c</sup> Peipei Yang<sup>a,b\*</sup>, Songwei Li<sup>a\*</sup>, Chuntai Liu<sup>a</sup>, Changyu Shen<sup>a</sup>*

5 <sup>a</sup> State Key Laboratory of Structural Analysis, Optimization and CAE Software for  
6 Industrial Equipment, National Engineering Research Center for Advanced Polymer  
7 Processing Technology, Key Laboratory of Materials Processing and Mold (Ministry of  
8 Education), Zhengzhou University, Zhengzhou 450002, China.

9 <sup>b</sup> Xiamen Branch of Luoyang Ship Material Research Institute, Xiamen, Fujian 361116,  
10 China.

11 <sup>c</sup> National Key Laboratory of Marine Corrosion and Protection, Xiamen, Fujian 361116,  
12 China.

13 \* Corresponding author. E-mail address: [lisw@zzu.edu.cn](mailto:lisw@zzu.edu.cn); [peipeiyang@zzu.edu.cn](mailto:peipeiyang@zzu.edu.cn)

14

## 15 **1. Supporting experimental Section**

### 16 **1.1 Characterization**

17 The FT-IR spectra of the samples were obtained by transmission test on a Nicolet  
18 6700 FT-IR spectrometer. The operating conditions of the instrument were as follows: 32  
19 scans with a scanning range of 4000-500  $\text{cm}^{-1}$ . X-ray photoelectron spectroscopy was  
20 characterized by Thermo Scientific K-alpha X-ray photoelectron spectrometer. During the  
21 test, the operating voltage was 12 kV, the filament current was 6 mA, the full-spectrum  
22 scanning pass energy was 150 eV, and the narrow-spectrum scanning pass energy was 50  
23 eV. The pressure in the analysis chamber was  $10^{-8}\sim 10^{-7}$  Pa. The microstructure of the  
24 nanofibers was observed by ZEISS Gemini 300 scanning electron microscope. The  
25 samples were treated with 10 mA gold injection to enhance the electrical conductivity. The  
26 operating voltage was 10 kV during the test. UV-visible diffuse reflectance spectroscopy  
27 was performed using Shimadzu UV 3600I Plus UV-visible near-infrared  
28 spectrophotometer with a slit width of 2.0, the test range was 200-600 nm, and the data  
29 interval was 1 nm. The photocurrent response, electrochemical impedance spectroscopy  
30 (EIS) was performed on a three-electrode CHI660e electrochemical workstation at  
31 Shanghai Chenhua Instrument Co., Ltd. The three-electrode system consists of platinum  
32 plate electrode, Ag/AgCl reference electrode and FTO working electrode. The electrolyte  
33 was 0.5 mol  $\text{L}^{-1}$   $\text{Na}_2\text{SO}_4$  solution. The photocurrent response test uses a 300W lamp as the  
34 light source with a bias of 0.6 V. During EIS test, the frequency range is 0.01 Hz-100 kHz,  
35 and the signal amplitude is 10 mV.

36 The Bruker820-MS inductively weighted plasma mass spectrometer from Bruker, a  
37 German company, can be used for qualitative and quantitative analysis of trace metal

38 element concentrations in seawater. The test range is  $1 \mu\text{g L}^{-1}$ - $500 \mu\text{g L}^{-1}$ . PerkinElmer  
39 Optima-7000 DV in the United States inductively coupled plasma atomic emission  
40 spectrum can be used to dissolve Liquid of high concentration of metal elements content  
41 in qualitative and quantitative analysis, the test scope for  $1 \text{ mg L}^{-1}$ - $500 \text{ mg L}^{-1}$  (higher than  
42  $500 \text{ mg L}^{-1}$  concentration of diluted to determine accurate). Fluorescence spectra (PL) and  
43 time-resolved spectra (TR-PL) were measured using the Edinburgh FLS980 steady-  
44 state/transient fluorescence spectrometer.

## 45 **1.2 Preparation of the GO**

46 5 g graphite power and 115 mL  $\text{H}_2\text{SO}_4$  were stirred for 1 h in the ice bath. 30 g  $\text{KMnO}_4$   
47 was slowly put into the above solution and reacted at  $0\text{-}3 \text{ }^\circ\text{C}$  for 3 h. Then, the solution was  
48 heated to  $50 \text{ }^\circ\text{C}$  and stirred for 45 min. 400 mL of  $\text{H}_2\text{O}$  was added and stirred for 15 min  
49 while the temperature was remained at  $50 \pm 5 \text{ }^\circ\text{C}$ . 300 mL of  $\text{H}_2\text{O}$  and 360 g, 5% of  $\text{H}_2\text{O}_2$   
50 were added and the solution was stirred for 15min. Finally, wash the solution with  
51 deionized water to a neutral pH.

## 52 **1.3 Preparation of the g- $\text{C}_3\text{N}_4$**

53 10 g of urea was placed in a ceramic crucible and heated in a tube furnace at  $550 \text{ }^\circ\text{C}$   
54 for 3 h at a rate of  $5 \text{ }^\circ\text{C min}^{-1}$ . The rate of cooling after the reaction is also  $5 \text{ }^\circ\text{C min}^{-1}$ . When  
55 sample reaches room temperature, the g- $\text{C}_3\text{N}_4$  was acquired. At last, place the g- $\text{C}_3\text{N}_4$  into  
56 a mortar and slowly grind them to a powder, for further use.

## 57 **1.4 Electrospinning parameter**

58 **PAO porous nanofiber film:** The spinning parameters were set as follows: positive

59 voltage 15 kV, negative voltage -3 kV. the speed of the receiver was set at 100 r min<sup>-1</sup>, the  
60 emission speed of the spinning nozzle was 0.06 mm min<sup>-1</sup>, the distance between the needle  
61 and the receiver was 15 cm, the translation distance was 10 mm, the spinning time was set  
62 at 8 h, and the spinning temperature was 25 °C.

63 **GO/g-C<sub>3</sub>N<sub>4</sub>/PAO porous nanofiber film:** The spinning parameters were set: the  
64 positive voltage was 18 kV and the negative voltage was -3 kV. the receiver speed was 100  
65 r min<sup>-1</sup>, the translation distance was 10 mm, and the needle distance from the receiver was  
66 15 cm. the emission speed of the spinning nozzle was 0.06 mm min<sup>-1</sup>, the spinning time  
67 was set to 8 h, and the spinning temperature was 25 °C.

## 68 **1.5 Uranium adsorption assay**

69 0.01 g adsorbent was added to a beaker containing 500 mL and 100 mg L<sup>-1</sup> uranyl ion  
70 solution. The pH of uranyl ion solution was adjusted with 0.1 mol L<sup>-1</sup> HNO<sub>3</sub> and 0.1 mol  
71 L<sup>-1</sup> NaHCO<sub>3</sub>. The uranium solution was irradiated with a xenon lamp (1 kW m<sup>-2</sup>) for  
72 adsorption. Meanwhile, the adsorption was also carried out under the condition of dark.  
73 After the adsorption, the adsorbed solution was measured and the uranyl ion concentration  
74 of the adsorbed solution was determined by Inductively Coupled Plasma-Atomic Emission  
75 Spectrometry (ICP-AES). According to the measured experimental data, the formula was  
76 adopted:

$$77 \quad q_e = (C_0 - C_e) * \frac{V}{m} \quad (S1)$$

78 Where  $q_e$  (mg g<sup>-1</sup>) is the adsorption capacity of the adsorbent after adsorption  
79 equilibrium;  $C_0$  and  $C_e$  (mg L<sup>-1</sup>) stand for initial and residual concentration of uranium,

80 respectively;  $V$  is the volume of the solution (L) and  $m$  is the mass of the adsorbent (g).

## 81 1.6 Kinetics studies

82 In the study of adsorption kinetics, the pseudo-first-order (S2), pseudo-second-order  
83 (S3) models and Elovich (S4) models were employed to interpret the mechanism  
84 controlling the adsorption process. The nonlinear form of the two models were expressed  
85 by the following Eqs.

86 S2-S4:

$$87 \quad q_t = (1 - Ae^{(-k_1 * t)}) \quad (S2)$$

$$88 \quad q_t = (t * k_2 * q_e^2) / (1 + k_2 * q_e * t) \quad (S3)$$

$$89 \quad q_t = \frac{1}{\beta} \ln(\alpha\beta t) \quad (S4)$$

90 Where  $q_t$  and  $q_e$  ( $\text{mg g}^{-1}$ ) stand for the adsorption capacity of U(VI) at time  $t$  (min) and  
91 at equilibrium, respectively.  $k_1$  ( $\text{min}^{-1}$ ) and  $k_2$  ( $\text{g (mg}^{-1} \text{ min)}^{-1}$ ) are the rate constants,  
92 respective.  $\alpha$  belongs to the initial adsorption rate ( $\text{mg (g*min)}^{-1}$ ), and  $\beta$  is the desorption  
93 constant ( $\text{g mg}^{-1}$ ).

## 94 1.7 Isotherms studies

95 In order to determine the maximum adsorption capacity of adsorbent, the adsorption  
96 isotherms were investigated Langmuir model (S6) and Freundlich (S7) models. were used  
97 to simulate the adsorption process of adsorbent.

98 S5-S7:

99 
$$q_e = q_m(b * C_e)/(1 + b * C_e) \quad (S5)$$

100 
$$q_e = kC_e^{\frac{1}{n}} \quad (S6)$$

101 
$$\ln q_e = \ln q_m - \beta \varepsilon^2 \quad (S7)$$

102 Where  $C_e$  ( $\text{mg L}^{-1}$ ) is the residual U(VI) concentration,  $q_e$  ( $\text{mg g}^{-1}$ ) stand for the  
103 adsorption capacity at equilibrium.  $k$  ( $\text{L mg}^{-1}$ ) belongs to Langmuir constant related to the  
104 energy of the adsorbent and  $q_m$  ( $\text{mg g}^{-1}$ ) represents the saturation adsorption capacity.  $\beta$  is  
105 the activity coefficient,  $\varepsilon$  is the Polanyi potential.

## 106 **1.8 Competitive adsorption**

107 Uranyl and some coexisting metal ions were dissolved into simulated seawater at 100  
108 times their actual concentration. Then 10 mg of GO/g-C<sub>3</sub>N<sub>4</sub>/PAO adsorbent was added to  
109 the mixing solution to perform the competitive adsorption assay. After 12 h of adsorption  
110 under simulated sunlight irradiation (or dark condition), the solution was filtered and a  
111 small amount of clear liquid was taken to test the concentration of remaining metal ions.

## 112 **1.9 Regeneration experiments**

113 0.01 g of GO/g-C<sub>3</sub>N<sub>4</sub>/PAO was added into 200 mL uranyl solution ( $C_0 = 100 \text{ mg L}^{-1}$ ,  
114  $\text{pH}=6$ ). The concentration of uranyl ion in supernatant was determined by ICP-AES after  
115 3 h of adsorption under light. The adsorbent after uranium adsorption was washed with  
116 deionized water. Then, the adsorbent material after uranium adsorption was appended to a

117 20 mL elution solution ( $0.1 \text{ mol L}^{-1} \text{ NaOH}$ ). The concentration of uranyl ions was  
118 determined by ICP-AES. Eventually, the elution efficiency of U(VI) ions was calculated.  
119 Repeat this experiment operation ten times.

#### 120 **1.10 Real seawater adsorption experiment**

121 1 mg of the adsorbing material was put into a shaped bottle, including 5 L of nature  
122 seawater. Then, put the adsorbent into the beaker to irradiate for adsorption under the  
123 condition of 300W,  $1 \text{ kw cm}^{-2}$ . After the adsorption, the solution was transferred to the  
124 centrifuge tube for centrifugation and then the supernatant was extracted and the  
125 concentration of residual uranium ion was detected by ICP-MS.

126 **2 Supporting figs and tables**

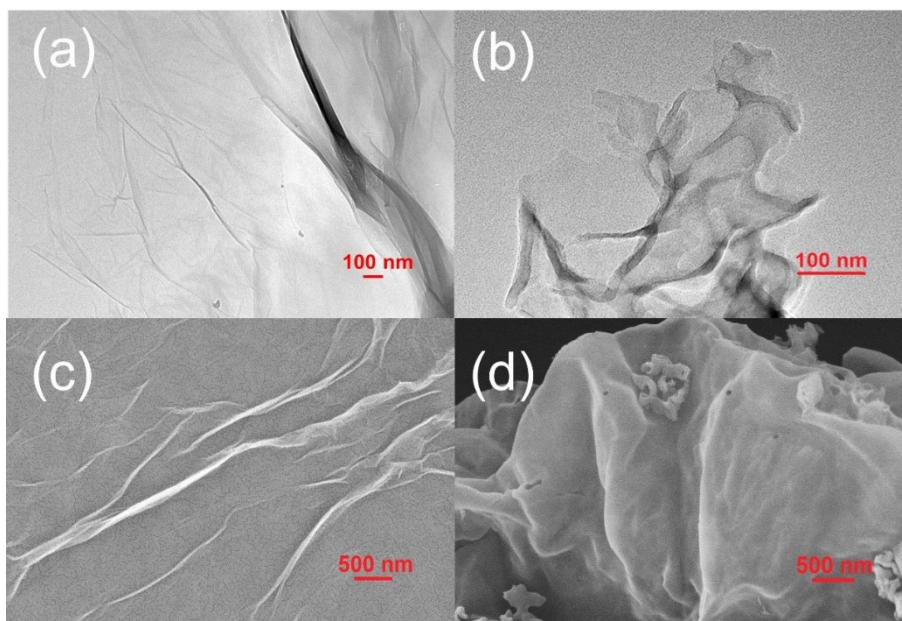

127

128 **Fig. S1** TEM images of (a) GO and (b) g-C<sub>3</sub>N<sub>4</sub>; SEM images of (c) GO and (d) g-C<sub>3</sub>N<sub>4</sub>.



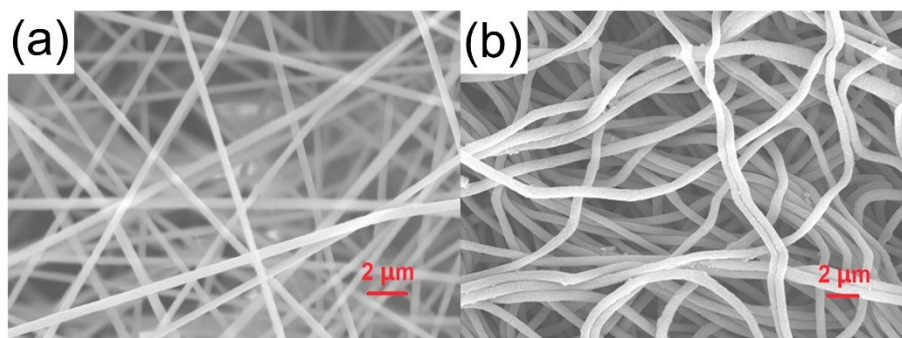

129

130 **Fig. S2** SEM images of (a) PAN nanofiber and (b)PAO nanofiber.

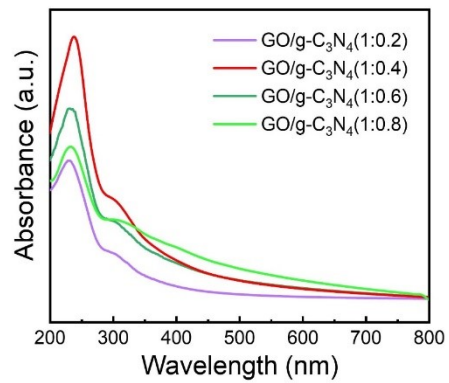

131

132 **Fig. S3** UV-vis DRS spectra of GO and g-C<sub>3</sub>N<sub>4</sub> with different ratios.

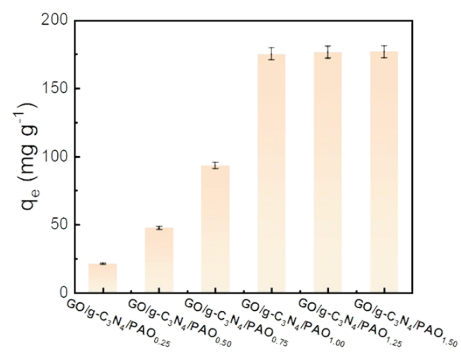

133

134 **Fig. S4** The adsorption capacity of GO/g-C<sub>3</sub>N<sub>4</sub> and PAN amidoxime in different

135 proportions.

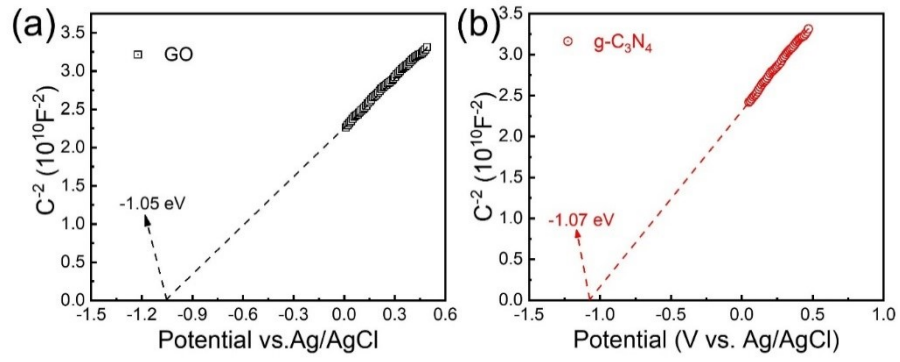

136

137 **Fig. S5** Mott-Schottky plots of (a) GO and (b) g-C<sub>3</sub>N<sub>4</sub>.

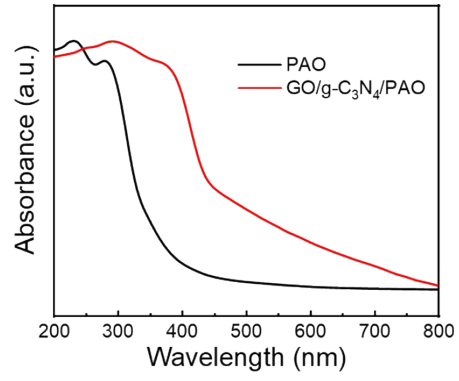

138

139 **Fig. S6** UV-vis DRS spectra of GO/g-C<sub>3</sub>N<sub>4</sub>/PAO, PAO.

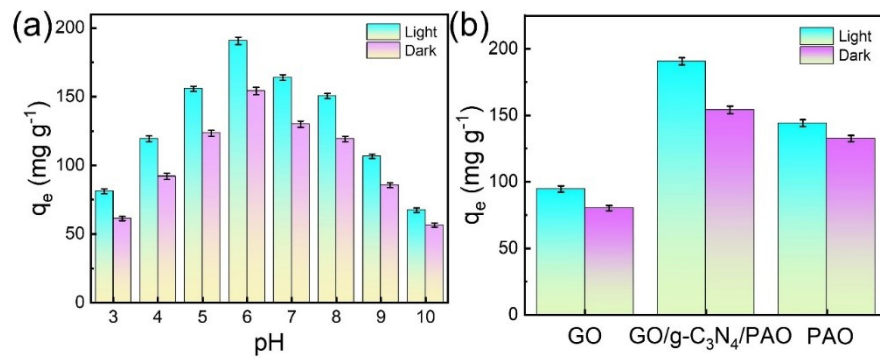

140

141 **Fig. S7** (a) Effect of pH on the light-dark adsorption profile of GO/g-C<sub>3</sub>N<sub>4</sub>/PAO ( $C_0=99.9$   
 142  $\text{mg L}^{-1}$ ,  $m/v = 0.5 \text{ g L}^{-1}$ ); (b) The effect on the adsorption of GO, PAO and GO/g-C<sub>3</sub>N<sub>4</sub>/PAO  
 143 under both light and dark conditions.

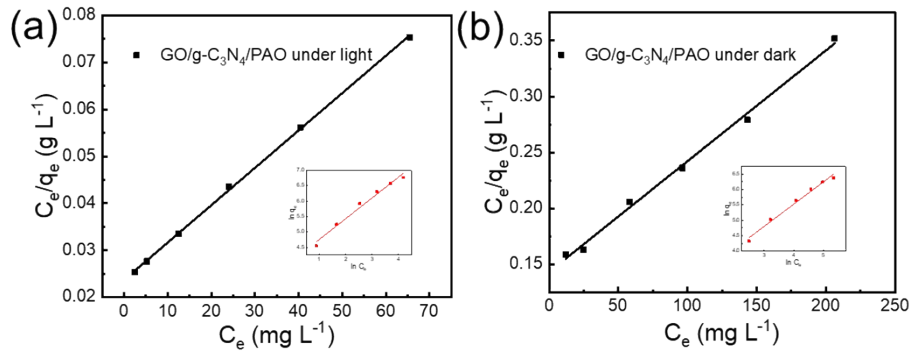

144

145 **Fig. S8** Fitting curves of GO/g-C<sub>3</sub>N<sub>4</sub>/PAO adsorbent to langmuir and freundlich models  
 146 (inset) under (a) simulated daylight and (b) dark conditions (pH = 6, t = 300 min, m/v =  
 147 0.5 g L<sup>-1</sup>).

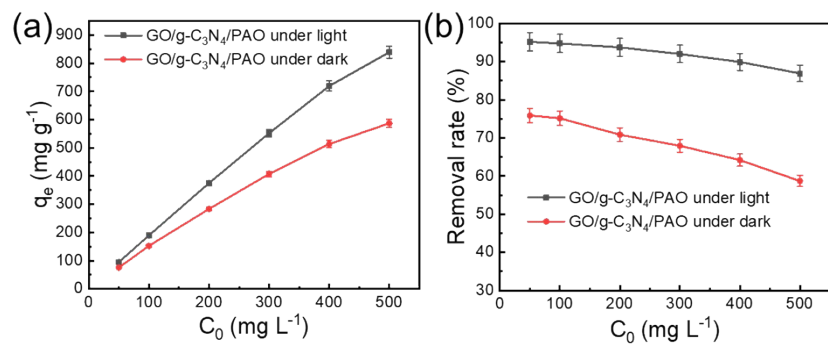

148

149 **Fig. S9** (a) Effects of different uranyl concentrations on GO/g-C<sub>3</sub>N<sub>4</sub>/PAO adsorption  
 150 capacity under light and dark conditions. (b) Removal rates at different uranyl  
 151 concentrations.

152 .



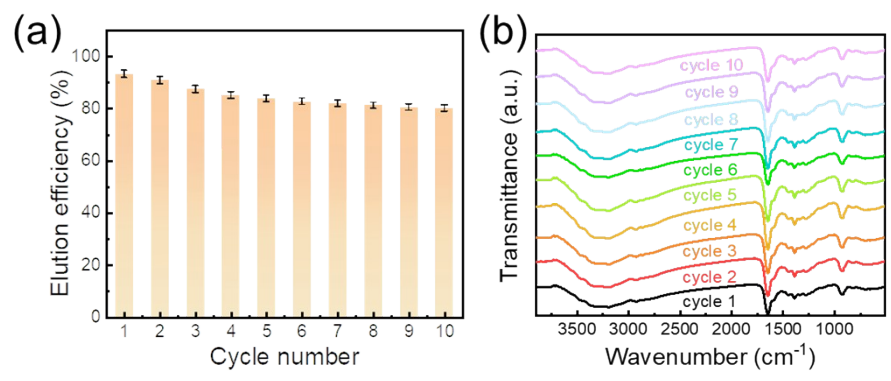

153

154 **Fig. S10** (a) Experiments on the renewable cycle of GO/g-C<sub>3</sub>N<sub>4</sub>/PAO. (b) FT-IR of  
155 GO/g-C<sub>3</sub>N<sub>4</sub>/PAO after ten cycles after ten cycles.

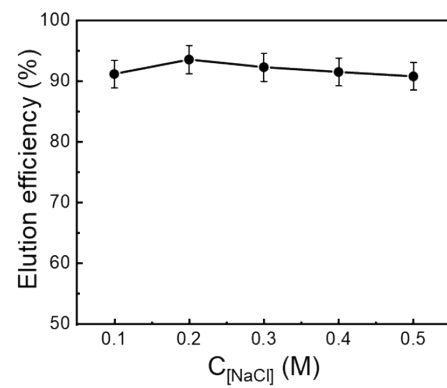

156

157 **Fig. S11** Effect of salt ion strength on adsorption properties of materials.

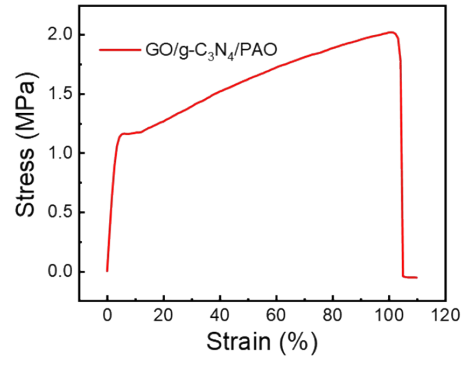

158

159 **Fig. S12** The stress-strain curve of GO/g-C<sub>3</sub>N<sub>4</sub>/PAO.

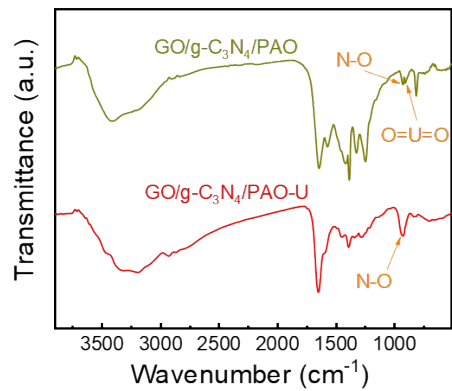

160

161 **Fig. S13** FT-IR spectra of GO/g-C<sub>3</sub>N<sub>4</sub>/PAO before and after uranium adsorption.

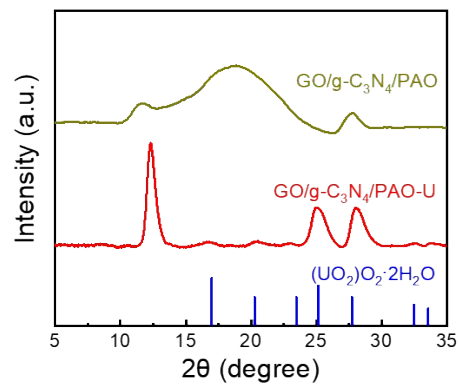

162

163 **Fig. S14** XRD before and after uranium adsorption by GO/g-C<sub>3</sub>N<sub>4</sub>/PAO.

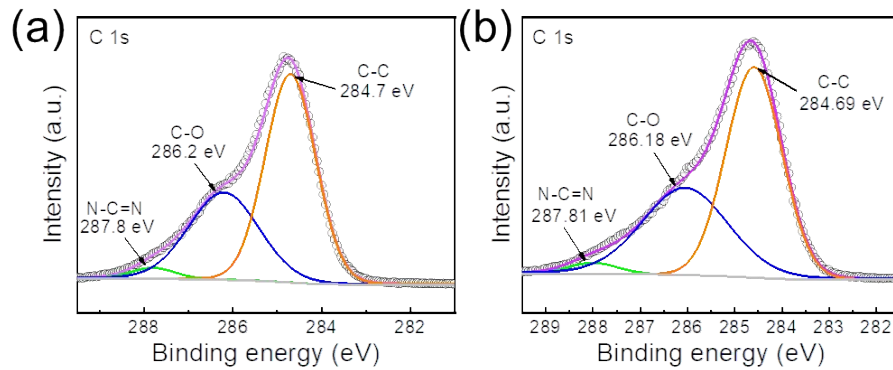

164

165 **Fig. S15** (a) High-resolution spectra of C 1s of GO/g-C<sub>3</sub>N<sub>4</sub>/PAO before adsorption of  
 166 uranyl ions; (b) High-resolution spectra of C 1s of GO/g-C<sub>3</sub>N<sub>4</sub>/PAO after adsorption of  
 167 uranyl ions.

168

**Table S1** Kinetic parameters of adsorption of uranyl ions

| Adsorbents                                     | Pseudo-second-order                            |        | Pseudo-first-order                              |                                                 |        |                                |
|------------------------------------------------|------------------------------------------------|--------|-------------------------------------------------|-------------------------------------------------|--------|--------------------------------|
|                                                | $q_{e2, \text{exp}}$<br>( $\text{mg g}^{-1}$ ) | $R^2$  | $k_2$<br>( $\text{g mg}^{-1} \text{min}^{-1}$ ) | $q_{e1}^{\text{cal}}$<br>( $\text{mg g}^{-1}$ ) | $R^2$  | $k_1$<br>( $\text{min}^{-1}$ ) |
| GO/g-C <sub>3</sub> N <sub>4</sub> /PAO -light | 196.08                                         | 0.9995 | $7.79 \times 10^{-4}$                           | 89.57                                           | 0.9181 | 0.0185                         |
| GO/g-C <sub>3</sub> N <sub>4</sub> /PAO -dark  | 156.25                                         | 0.9996 | $10.60 \times 10^{-4}$                          | 67.35                                           | 0.9271 | 0.0166                         |

169

170

**Table. S2** Thermodynamic parameters of adsorbed uranyl

| Adsorbents                                     | Langmuir isotherm               |                               |        | Freundlich isotherm           |      |       |
|------------------------------------------------|---------------------------------|-------------------------------|--------|-------------------------------|------|-------|
|                                                | $q_m$<br>( $\text{mg g}^{-1}$ ) | $b$<br>( $\text{L mg}^{-1}$ ) | $R^2$  | $K$<br>( $\text{L mg}^{-1}$ ) | $n$  | $R^2$ |
| GO/g-C <sub>3</sub> N <sub>4</sub> /PAO -light | 1256                            | 0.039                         | 0.9993 | 59.15                         | 1.49 | 0.979 |
| GO/g-C <sub>3</sub> N <sub>4</sub> /PAO -dark  | 1010                            | 0.007                         | 0.9945 | 13.89                         | 1.37 | 0.984 |

171

172

**Table S3** The elution efficiency of different desorption agents

| Eluent                          | Elution efficiency (%) |
|---------------------------------|------------------------|
| NaOH                            | 93.3                   |
| NaHCO <sub>3</sub>              | 60.3                   |
| HCl                             | 46.6                   |
| H <sub>2</sub> O                | 6.3                    |
| Na <sub>2</sub> CO <sub>3</sub> | 61.9                   |

173

**Table S4** Uranium sorption performance of various adsorbing materials

| Adsorbents                                           | $q_e$ (mg g <sup>-1</sup> ) | T (day) | Reference        |
|------------------------------------------------------|-----------------------------|---------|------------------|
| Fe <sub>3</sub> O <sub>4</sub> @TiO <sub>2</sub> -AO | 0.0875                      | 33      | 1                |
| Ti <sub>3</sub> C <sub>2</sub> -AO-PA                | 4.94                        | /       | 2                |
| MP-PAO                                               | 5.80                        | 24      | 3                |
| CI-PAO                                               | 6.17                        | 28      | 4                |
| PAN/ZIF-67                                           | 2.03                        | 36      | 5                |
| PAGM-1                                               | 6.21                        | 30      | 6                |
| GO/g-C <sub>3</sub> N <sub>4</sub> /PAO              | 10.39                       | 30      | <b>This work</b> |



176 **Reference**

- 177 1. N. Li, P. Gao, H. Chen, F. Li and Z. Wang, Amidoxime modified  $\text{Fe}_3\text{O}_4@\text{TiO}_2$   
178 particles for antibacterial and efficient uranium extraction from seawater,  
179 *Chemosphere*, 2022, **287**,132137.
- 180 2. D. Zhang, L. Liu, B. Zhao, X. Wang, H. Pang and S. Yu, Highly efficient extraction  
181 of uranium from seawater by polyamide and amidoxime co-functionalized MXene,  
182 *Environ. Pollut.*, 2023, **317**,120826.
- 183 3. H. Wang, B. Zheng, T. Xu, M. Cao, F. Gao, G. Zhou, C. Ma, J. Dang, W. Yao, K.  
184 Wu, T. Liu, Y. Yuan, Q. Fu and N. Wang, Macroporous hydrogel membrane by  
185 cooperative reaming for highly efficient uranium extraction from seawater, *Sep.*  
186 *Purif. Technol.*, 2022, **289**,120823.
- 187 4. H. Wang, T. Xu, B. Zheng, M. Cao, F. Gao, G. Zhou, C. Ma, J. Dang, W. Yao, K.  
188 Wu, T. Liu, Y. Yuan, Q. Fu and N. Wang, Cuttlefish ink loaded polyamidoxime  
189 adsorbent with excellent photothermal conversion and antibacterial activity for  
190 highly efficient uranium capture from natural seawater, *J. Hazard. Mater.*, 2022,  
191 **433**,128789.
- 192 5. W. Li, Y.-Y. Liu, Y. Bai, J. Wang and H. Pang, Anchoring ZIF-67 particles on  
193 amidoximerized polyacrylonitrile fibers for radionuclide sequestration in  
194 wastewater and seawater, *J. Hazard. Mater.*, 2020, **395**,122692.
- 195 6. H. Li, J. Sun, S. Qin, Y. Song, Z. Liu, P. Yang, S. Li, C. Liu and C. Shen, Zwitterion  
196 Functionalized Graphene Oxide/Polyacrylamide/Polyacrylic Acid Hydrogels with  
197 Photothermal Conversion and Antibacterial Properties for Highly Efficient  
198 Uranium Extraction from Seawater, *Adv. Funct. Mater.*, 2023, **33**,2301773.
